# Supplementary material for: Effects of Modern Food Retailers on Adult and Child Diets and Nutrition
Source: PubMed Central journal article supplement (PMC7353018; doi:10.3390/nu12061714), 2020-06-08
Supplement: nutrients-12-01714-s001.pdf [file nutrients-12-01714-s001.pdf]

## SUPPLEMENTARY MATERIALS

### Effects of Modern Food Retailers on Adult and Child Diets and Nutrition

#### Supplementary Methods

##### *Sampling Design*

We surveyed a total of 475 households from several compounds/sections in Lusaka City using a two-stage sampling procedure. At the first stage, we purposively selected 14 compounds/sections as primary sampling units based on population distributions and information from the Lusaka City Council on mean income levels in the different compounds/sections. To ensure that the sample is representative and covers a wide variation of socioeconomic situations, we selected four compounds/sections (Avondole, Chalala, Kabulonga, and Woodlands) with high mean income levels, four compounds/sections (Chelston, Chilenje, Kabwata, and PHI) with middle mean income levels, and six compounds/sections (Chawama, Chazanga, Gardens, Kalingalinga, Kaunda Square, and Ng'ombe) with low mean income levels (Supplementary Figure S1). At the second stage, depending on the size of the compound/section, we randomly sampled about 35 households from each compound/section for study participation.

##### *Measuring Micronutrient Adequacy*

We calculated nutrient adequacy ratios for iron, zinc, and vitamin A. The micronutrient adequacy ratio was calculated as the individual micronutrient intake divided by the estimated average requirements for the respective age and sex group, expressed as a percentage based on the procedure described by Steyn and colleagues [1]. The estimated average requirements used are shown in Supplementary Table S5. We calculated the mean adequacy ratio by summing the micronutrient adequacy ratios (truncated at 100%) for the three micronutrients and dividing by three [1].

##### *Control Function Approach*

In the regression models, the main explanatory variable of interest (“treatment” variable) is food purchases in modern retailers ( $MR_{hi}$ ). What type of retailers to use for food purchases is a household-level decision that may depend on various factors not all of which we can observe and control for. If unobserved factors are jointly correlated with  $MR_{hi}$  and with the dietary and nutrition outcome variables, the coefficient estimate  $\beta$  may be biased.

We used a control function (CF) approach with instrumental variables (IV) to test and correct for such endogeneity bias [2,3]. In comparison to standard IV regressions, the CF estimator is more efficient and can

also be used to control for unobserved heterogeneity in non-linear models, such as probit and Poisson models [3]. The CF was estimated as a two-stage model, whereby the first-stage regression was represented as:

$$MR_{hi} = \theta_0 + \theta_1 X_i + \theta_2 X_{hi} + \theta_3 Z_{hi} + \mu_i$$

where  $Z_{hi}$  is a vector of instrumental variables, and  $\mu_i$  is a random error term. The other variables were defined as in the main paper. The second-stage model was the regression equation shown in the main paper with the individual diet and nutrition outcomes as dependent variable but including the residuals from the first-stage model as an additional regressor. If the residual term was statistically insignificant in the second-stage regression, the null hypothesis of no endogeneity bias could not be rejected, so the CF approach was not required; in that case, the regular one-stage models led to unbiased and more efficient estimates. However, if the residual term turned out statistically significant, the CF approach was preferred to control for endogeneity bias.

#### *Instrumental Variables*

We used three instrumental variables for the CF models. First, distance from each household to the closest shopping mall, which was calculated using global positioning system (GPS) data collected during the survey. GPS-based data to measure distance to modern retailers were also used as instruments in several other studies [4–7]. Second, whether or not the household felt that modern retailers sell food of higher quality than traditional retailers, which was also used by Umberger et al. [4]. Third, the number of visits to a shopping mall of the household’s closest neighbor in the sample. Beyond distance and accessibility, the neighbor’s behavior may capture influence through local social networks [8]. Tests for instrument validity are discussed below.

All three instruments are significantly correlated with the household’s own use of modern retailers,  $MR_{hi}$  (Supplementary Table S21). As expected, distance to the closest shopping mall is negatively correlated, while the other two instruments are positively correlated with the food expenditure share spent in modern retailers. Moreover, the Wald test for the joint significance of the three instruments is statistically significant at the 1% level for both adults and children (Supplementary Table S21). This underlines that the instruments are relevant. A second important criterion for validity is that the instruments do not affect the dietary and nutrition outcome variables directly, other than through own use of modern retailers. We performed a simple falsification test following Di Falco et al. [9]. Results show that the three instruments are jointly insignificant in all models with dietary and nutrition outcomes as dependent variables (Supplementary Table S22). Hence, we conclude that the instruments are valid.



**Table S1.** List of main shopping malls with modern retailers in Lusaka City in 2018

| No. | Name of Shopping Mall | Location and Surrounding Compounds/Sections                                                      | Modern Retailers: Hypermarkets, Supermarkets (Fast-food Restaurants in Parentheses)                                                            |
|-----|-----------------------|--------------------------------------------------------------------------------------------------|------------------------------------------------------------------------------------------------------------------------------------------------|
| 1   | Arcades               | Roma, University of Zambia (UNZA)                                                                | Spurs                                                                                                                                          |
| 2   | Cairo                 | Central Lusaka                                                                                   | Shoprite (Food Fayre, Hungry Lion, Machachos)                                                                                                  |
| 3   | Chawama               | Chawama, John Haward, Kuku                                                                       | Spur                                                                                                                                           |
| 4   | Chazanga Shoprite     | Chazanga, SOS                                                                                    | Shoprite                                                                                                                                       |
| 5   | Chilenje Shoprite     | Chalala, Chilenje, Woodlands                                                                     | Choppies, Shoprite (Debonairs Pizza, MM Chickens, Naaz)                                                                                        |
| 6   | Choppies Complex      | Kabulonga, Sundel, Zamtel Flats                                                                  | Choppies                                                                                                                                       |
| 7   | Cosmopolitan          | Chawama, John Howard, Jon-Lengi, Makeni, Misisi                                                  | Game Stores, Shoprite (Chicken Inn, Galito's, Hungry Lion, Mochachos, Pizza Hut)                                                               |
| 8   | Cross Roads           | Cross Road, Kabulonga, Nyumba Yanga, Sundel                                                      | Spurs (Gigibonta, Major Meat)                                                                                                                  |
| 9   | Down Town             | Chibolya, Jon-Lengi, Kabwata, Kamwala, Misisi                                                    | Spurs (Big Bite, Debonairs Pizza, Down Town Foods)                                                                                             |
| 10  | East Park             | Childley, Kalingalinga, Kalundu, Ng'ombe, Roma, UNZA                                             | Food Lover's, PicknPay (Fishaways, Gigibonta, GoatnChips, Hungry Lion, KEG, Pizza Hut)                                                         |
| 11  | Embassy               | Chawama, Jon-Lengi, Makeni, Misisi                                                               | Embassy, Spurs (Papas, Piatto, Zorbas)                                                                                                         |
| 12  | Garden City           | Avondole, Chelston                                                                               | Food Lover's, PicknPay (Bushman, Foodano)                                                                                                      |
| 13  | Kabulonga and Melissa | Kabulonga                                                                                        | Melissa, PicknPay (Debonairs Pizza, KFC, Nando's, Subway)                                                                                      |
| 14  | Levy Junction         | Central Lusaka, Chilulu, Evelyn Home College, Gardens, Nippa, North Mead, Roads Park, Thorn Park | Food Lover's, PicknPay (Chicken Inn, Hungry Lion, KFC, Pizza Inn, Wimpy)                                                                       |
| 15  | Makeni                | Chawama, Jon-Lengi, Makeni, Misisi                                                               | Food Lover's, PicknPay (Debonairs Pizza, KFC, Nando's)                                                                                         |
| 16  | Mama Betty Foxydale   | Ng'o'mbe, Roma                                                                                   | Spur (Debonairs Pizza, Gigibonta)                                                                                                              |
| 17  | Manda Hill            | Central Lusaka, Chilulu, Gardens, Longacres, Olympia, Roads Park                                 | Shoprite, Game Stores (Bread Café, Debonairs Pizza, Galito's, Hungry Lion, Mugg and Bean, My Asia, Nando's, Pizza Inn, Steers, Subway, Vasila) |
| 18  | Matero                | Matero                                                                                           | Shoprite (Hungry Lion)                                                                                                                         |
| 19  | Novara Great North    | Chazanga, SOS                                                                                    | PicknPay (GoatnChips, Hungry Lion)                                                                                                             |
| 20  | PHI                   | Kaunda Square, PHI, Mtendere                                                                     | PicknPay (Debonairs Pizza, King-Pie)                                                                                                           |
| 21  | SOS Spurs             | Chazanga, SOS                                                                                    | Spur                                                                                                                                           |
| 22  | Twin Palm             | Avondole, Chelston, Ibex, Salama Park                                                            | Shoprite (Chicken Inn, Debonairs Pizza, Hungry Lion)                                                                                           |
| 23  | Waterfalls            | Avondole, Chelston                                                                               | Shoprite (Gigibonta, Hungry Lion)                                                                                                              |
| 24  | Woodlands             | Chilenje, Kabulonga, Woodlands                                                                   | PicknPay (Creamy, Debonairs Pizza, Galito's, Nachies, O. Hagans, Pizza Inn)                                                                    |
| 25  | Zappa                 | Chawama                                                                                          | (Debonairs Pizza)                                                                                                                              |

The main shopping malls that were operating in 2018 are included. Very small shopping malls were not included. Likewise, malls that were still under construction in 2018 were not included. The list was compiled by the authors based on internet search, personal visits, and key informant interviews.

**Table S2.** Distribution of sampled individuals in Lusaka City

| Name of the Surveyed<br>Compounds/Sections                                      | Income<br>Level | By Sex and Age Cohort        |                            |                                     | All |      |
|---------------------------------------------------------------------------------|-----------------|------------------------------|----------------------------|-------------------------------------|-----|------|
|                                                                                 |                 | Adult Females<br>(≥18 years) | Adult Males<br>(≥18 years) | Children/Adolescents<br>(<18 years) |     |      |
|                                                                                 |                 |                              |                            | Girls                               |     | Boys |
| Four: Avondole, Chalala,<br>Kabulonga, and Woodlands                            | High            | 121                          | 76                         | 46                                  | 39  | 282  |
| Four: Chelston, Chilenje, Kabwata,<br>and PHI                                   | Middle          | 250                          | 122                        | 94                                  | 93  | 559  |
| Six: Chawama, Chazanga, Gardens,<br>Kalingalinga, Kaunda Square, and<br>Ng'ombe | Low             | 252                          | 109                        | 131                                 | 96  | 588  |
| All                                                                             |                 | 623                          | 307                        | 271                                 | 228 | 1429 |

**Table S3.** Food processing levels by food groups and items

| <b>Processing Level</b> | <b>Food Group</b>                  | <b>Food Items (Examples)</b>                                                                                                                                                                                          |
|-------------------------|------------------------------------|-----------------------------------------------------------------------------------------------------------------------------------------------------------------------------------------------------------------------|
| Unprocessed foods       | Cereals and tubers                 | Maize (dry/green), cassava, irish potato, sweet potato, yams                                                                                                                                                          |
|                         | Eggs and milk                      | Eggs, fresh whole milk                                                                                                                                                                                                |
|                         | Fruits                             | Apples, avocado, banana (ripe/boiled), guava, mango, pawpaw, pineapple, pumpkin, orange/tangerine, sugar plum, watermelon                                                                                             |
|                         | Legumes                            | Bean (fresh/dry), cowpea (fresh/dry), groundnut (fresh/dry), pigeonpea (fresh/dry), soybean, velvet bean                                                                                                              |
|                         | Vegetables                         | Bean leaves, blackjack, cabbage, carrot, cassava leaves, cowpea leaves, cucumber, eggplant, garlic, greengram, lettuce, mushroom (cultivated/wild), okra, onion, pepper, pumpkin leaves, rape/mustard/chinese, tomato |
| Primary processed foods | Drinks and snacks                  | Bottled/clear beer, bottled water, roasted cashew/macadamia nuts                                                                                                                                                      |
|                         | Meat and fish                      | Beef, bush/game meat, chicken, duck, turkey, goat meat, sheep meat, pork, fish (fresh/frozen/dried)                                                                                                                   |
|                         | Cereals                            | Rice, millet, oats, sorghum                                                                                                                                                                                           |
| Ultra-processed foods   | Bread and pasta                    | Bread, buns, pasta, instant noodles                                                                                                                                                                                   |
|                         | Cereals and tubers                 | Maize flour, cornflakes, porridge mix, wheat flour, cassava flour                                                                                                                                                     |
|                         | Dairy products                     | Cheese, milk, yoghurt                                                                                                                                                                                                 |
|                         | Oils and fats                      | Butter/margarine, coconut oil, cooking oil/fat                                                                                                                                                                        |
|                         | Meat and fish                      | Sausage (beef/chicken/pork), soya meat, canned meat and fish                                                                                                                                                          |
|                         | Miscellaneous                      | Canned foods, mandazi, mixed fruits/salads, pizza, samosa, ready-made foods/dishes                                                                                                                                    |
|                         | Sugar, sweetened drinks and snacks | Soft drinks, sweetened fruit juices, wine, jam, tomato sauce, salt, sugar, biscuits/cookies, cake, chips, chocolate, crisps, puffed salted corn chips, popcorn, salted nuts                                           |

*Note:* The same classifications of foods were also used by [10,11].

**Table S4.** Food groups and components used for construction of dietary quality indicators

| <i>Dietary Diversity Score</i>    |                                     |                                                                   |                |
|-----------------------------------|-------------------------------------|-------------------------------------------------------------------|----------------|
| Group                             | Food Groups                         | Food Items (Examples)                                             | Weight         |
| 1                                 | Cereals and tubers                  | Maize, rice, sorghum, millet, bread, cassava, potatoes, plantains | 1              |
| 2                                 | Pulses                              | Beans, cowpea, groundnuts, pigeonpea, soybean, velvet beans       | 1              |
| 3                                 | Meat                                | Beef, chicken, ducks, goat meat, sheep meat, and pork             | 1              |
| 4                                 | Fish                                | Fish (fresh/frozen/dried/tinned)                                  | 1              |
| 5                                 | Eggs                                | Eggs                                                              | 1              |
| 6                                 | Vitamin A rich vegetables           | Cassava leaves, sweet potato leaves                               | 1              |
| 7                                 | Other vegetables                    | Tomatoes, cabbage etc.                                            | 1              |
| 8                                 | Fruits                              | Fruits                                                            | 1              |
| 9                                 | Dairy                               | Milk, yoghurt, and other dairy products                           | 1              |
| <i>Healthy Eating Index (HEI)</i> |                                     |                                                                   |                |
| Component                         | Standard for Maximum Score          | Standard for Minimum Score (Zero)                                 | Maximum Points |
| <i>Adequacy</i>                   |                                     |                                                                   |                |
| Total fruits                      | ≥0.8 cup equivalent per 1000 kcal   | No fruit                                                          | 5              |
| Whole fruits                      | ≥0.4 cup equivalent per 1000 kcal   | No whole fruit                                                    | 5              |
| Total vegetables                  | ≥1.1 cup equivalent per 1000 kcal   | No vegetables                                                     | 5              |
| Greens and beans                  | ≥0.2 cup equivalent per 1000 kcal   | No dark-green vegetables or pulses                                | 5              |
| Whole grains                      | ≥1.5 ounce equivalent per 1000 kcal | No whole grains                                                   | 10             |
| Dairy                             | ≥1.3 cup equivalent per 1000 kcal   | No dairy                                                          | 10             |
| Total protein foods               | ≥2.5 ounce equivalent per 1000 kcal | No protein foods                                                  | 5              |
| Seafood and plant proteins        | ≥0.8 ounce equivalent per 1000 kcal | No seafood or plant proteins                                      | 5              |
| Fatty acids <sup>a</sup>          | (PUFAs+MUFAs)/SFAs≥2.5              | (PUFAs+MUFAs)/SFAs≤1.2                                            | 10             |
| <i>Moderation</i>                 |                                     |                                                                   |                |
| Refined grains                    | ≤1.8 ounce equivalent per 1000 kcal | ≥4.3 ounce equivalent per 1000 kcal                               | 10             |
| Sodium                            | ≤1.1 grams per 1000 kcal            | ≥2.0 grams per 1000 kcal                                          | 10             |
| Added sugars                      | ≤6.5% of energy                     | ≥26% of energy                                                    | 10             |
| Saturated fats                    | ≤8% of energy                       | ≥16% of energy                                                    | 10             |

<sup>a</sup> Ratio of poly-and mono-unsaturated fatty acids (PUFAs and MUFAs) to saturated fatty acids (SFAs). HEI components and weights based on [12–14].

**Table S5.** Estimated average requirements of calories and nutrients by sex and age cohort

| Sex     | Age<br>(years)      | Calorie and Nutrients <sup>a</sup> |                                 |                  |                               |                               |
|---------|---------------------|------------------------------------|---------------------------------|------------------|-------------------------------|-------------------------------|
|         |                     | Calorie <sup>b</sup><br>(kcal/day) | Protein <sup>d</sup><br>(g/day) | Iron<br>(mg/day) | Zinc <sup>e</sup><br>(mg/day) | Vitamin A<br>(µg retinol/day) |
| Child   | 1-3                 | 531 <sup>c</sup>                   | 10.0                            | 5.8              | 2.0                           | 200                           |
|         | 4-6                 | 595 <sup>c</sup>                   | 14.8                            | 6.3              | 3.0                           | 200                           |
|         | 7-9                 | 680 <sup>c</sup>                   | 21.0                            | 8.9              | 5.0                           | 250                           |
|         | 10-18               | 2200                               | 36.4                            | 8.0              | 8.6                           | 330                           |
| Males   | 19-65               | 2400                               | 55.5                            | 11.0             | 10.0                          | 300                           |
|         | ≥66                 | 2200                               | 54.6                            | 8.0              | 10.0                          | 300                           |
| Females | 10-18               | 1600                               | 38.6                            | 8.0              | 7.0                           | 330                           |
|         | 19-65 non-lactating | 2000                               | 54.9                            | 18.0             | 6.0                           | 270                           |
|         | ≥66                 | 1800                               | 57.1                            | 8.0              | 6.0                           | 300                           |

<sup>a</sup> Estimated average requirements for nutrients are based on FAO [15], WHO and FAO [16], and IOM [17]. <sup>b</sup> Estimated average energy (calories) requirements for adults are based on IOM [18], assuming a moderate active individual. <sup>c</sup> Daily energy requirements obtained by averaging values for respective age groups from Table 3-2 in FAO [18]. <sup>d</sup> Anthropometric data (weight in kg) and the reference body weight of 0.8 g/kg/day [18] used as conversion factor to calculate daily protein requirements for individuals. <sup>e</sup> Zinc requirements are based in International Zinc Nutrition Consultative Group (IZiNCG) for mixed or refined vegetarian diets [19].



**Table S6.** Additional descriptive statistics for users and non-users of modern retailers

| Variables                             | Units                       | Adults (≥18 years)      |                        | Children (<18 years)    |                        |
|---------------------------------------|-----------------------------|-------------------------|------------------------|-------------------------|------------------------|
|                                       |                             | Modern Retailers        |                        | Modern Retailers        |                        |
|                                       |                             | Users<br>(N = 713)      | Non-users<br>(N = 217) | Users<br>(N = 358)      | Non-users<br>(N = 141) |
| <i>Dependent variables</i>            |                             |                         |                        |                         |                        |
| Mean adequacy ratio                   | Percent, %                  | 91.51***<br>(17.68)     | 86.99<br>(21.51)       | 93.44<br>(16.03)        | 92.22<br>(17.92)       |
| Iron                                  | Percent, %                  | 171.96<br>(103.61)      | 175.87<br>(101.25)     | 227.98<br>(122.89)      | 245.23<br>(157.20)     |
| Zinc                                  | Percent, %                  | 108.69<br>(85.02)       | 108.93<br>(84.95)      | 116.23<br>(77.49)       | 119.10<br>(136.35)     |
| Vitamin A                             | Percent, %                  | 185.79***<br>(176.86)   | 146.75<br>(165.23)     | 185.80*<br>(202.58)     | 150.76<br>(176.71)     |
| <i>Treatment variable</i>             |                             |                         |                        |                         |                        |
| Modern retailer use                   | Expenditure share, %        | 59.30***<br>(31.13)     | 0.00<br>(0.00)         | 51.59***<br>(30.49)     | 0.00<br>(0.00)         |
| <i>Control variables</i>              |                             |                         |                        |                         |                        |
| Household income                      | US\$/capita/year            | 3265.18***<br>(3306.72) | 1041.53<br>(1212.42)   | 2575.76***<br>(3454.14) | 866.82<br>(1141.88)    |
| Male                                  | 1= Yes, 0 otherwise         | 0.33<br>(0.47)          | 0.33<br>(0.47)         | 0.46<br>(0.50)          | 0.45<br>(0.50)         |
| Age of household respondent           | Years                       | 34.84<br>(13.97)        | 36.56<br>(15.08)       | 8.98<br>(4.87)          | 8.59<br>(4.73)         |
| Education of respondent               | Schooling years             | 12.27***<br>(3.18)      | 9.32<br>(3.39)         | 4.07**<br>(3.93)        | 3.29<br>(3.39)         |
| Household size                        | Number of members           | 4.47***<br>(1.60)       | 4.89<br>(1.89)         | 4.93<br>(1.45)          | 5.16<br>(1.60)         |
| Bemba as ethnicity                    | 1= Yes, 0 otherwise         | 0.29**<br>(0.45)        | 0.20<br>(0.40)         | 0.34*<br>(0.47)         | 0.26<br>(0.44)         |
| Chewa as ethnicity                    | 1= Yes, 0 otherwise         | 0.12**<br>(0.33)        | 0.18<br>(0.38)         | 0.12**<br>(0.32)        | 0.18<br>(0.39)         |
| Tonga as ethnicity                    | 1= Yes, 0 otherwise         | 0.21<br>(0.41)          | 0.20<br>(0.40)         | 0.15<br>(0.35)          | 0.17<br>(0.38)         |
| Protestant as a religion              | 1= Yes, 0 otherwise         | 0.44<br>(0.50)          | 0.41<br>(0.49)         | 0.49<br>(0.50)          | 0.45<br>(0.50)         |
| Catholic as a religion                | 1= Yes, 0 otherwise         | 0.25**<br>(0.43)        | 0.32<br>(0.47)         | 0.18***<br>(0.39)       | 0.33<br>(0.47)         |
| Physical activity ratio               | Ratio; range (0.03–15.95)   | 2.74<br>(1.45)          | 2.76<br>(1.71)         | 3.52<br>(2.26)          | 3.58<br>(2.35)         |
| Piped or tap drinking water           | 1= Yes, 0 otherwise         | 0.94**<br>(0.24)        | 0.88<br>(0.32)         | 0.92*<br>(0.27)         | 0.87<br>(0.34)         |
| Non-chronic infections                | 1= Yes, 0 otherwise         | 0.27<br>(0.44)          | 0.26<br>(0.44)         | 0.27*<br>(0.45)         | 0.19<br>(0.39)         |
| Distance to the nearest               | km; range (0.01–30)         | 2.38***<br>(2.06)       | 1.90<br>(1.81)         | 2.32<br>(2.01)          | 2.07<br>(3.00)         |
| High quality food products            | 1= Yes, 0 otherwise         | 0.23***<br>(0.42)       | 0.01<br>(0.12)         | 0.18***<br>(0.38)       | 0.04<br>(0.19)         |
| Neighbor's shopping mall              | Number of visits per week   | 2.88***<br>(2.91)       | 1.68<br>(2.25)         | 3.00***<br>(3.04)       | 1.48<br>(2.31)         |
| Household distance to a shopping mall | GPS-measured distance in km | 2.57***<br>(2.57)       | 3.59<br>(2.26)         | 2.53***<br>(2.50)       | 3.88<br>(2.49)         |

Mean values are shown with standard deviations in parentheses. The average exchange rate was ZMW 9.87 = US\$ 1 in mid-2018. *t*-tests were used to test for mean differences between users and non-users of modern retailers. \*  $p < 0.10$ , \*\*  $p < 0.05$ , \*\*\*  $p < 0.01$ .

**Table S7.** Household expenditure shares for foods at different processing levels

|                             | Modern Retailers |                  |                  | Mean Difference<br>(4) = (2) – (3) |
|-----------------------------|------------------|------------------|------------------|------------------------------------|
|                             | Overall          | Users            | Non-users        |                                    |
|                             | (1)              | (2)              | (3)              |                                    |
| Unprocessed foods (%)       | 24.70<br>(14.17) | 22.97<br>(12.77) | 30.14<br>(16.80) | -7.17***<br>(1.48)                 |
| Primary processed foods (%) | 40.10<br>(17.13) | 41.96<br>(16.26) | 34.28<br>(18.48) | 7.68***<br>(1.80)                  |
| Ultra-processed foods (%)   | 35.19<br>(13.52) | 35.07<br>(12.97) | 35.58<br>(15.16) | -0.51<br>(1.45)                    |
| N                           | 475              | 360              | 115              | 475                                |

Mean values are shown with standard deviations in parentheses (standard errors in column 4). \*\*\*  $p < 0.01$ . N, number of observations.

**Table S8.** Effects of using modern retailers on dietary composition in terms of food processing levels (full model results for Table 3)

|                                             | Unprocessed Foods<br>(expenditure share, %) |                      | Primary Processed Foods<br>(expenditure share, %) |                     | Ultra-Processed Foods<br>(expenditure share, %) |                      |
|---------------------------------------------|---------------------------------------------|----------------------|---------------------------------------------------|---------------------|-------------------------------------------------|----------------------|
|                                             | OLS                                         | CF                   | OLS                                               | CF                  | OLS                                             | CF                   |
|                                             | (1)                                         | (2)                  | (3)                                               | (4)                 | (5)                                             | (6)                  |
| Modern retail use<br>(expenditure share, %) | -0.071**<br>(0.027)                         | -0.060<br>(0.058)    | 0.018<br>(0.023)                                  | -0.005<br>(0.079)   | 0.053*<br>(0.025)                               | 0.065<br>(0.063)     |
| Male household head (dummy)                 | 0.755<br>(1.899)                            | 0.870<br>(1.317)     | -0.619<br>(1.934)                                 | -0.866<br>(1.758)   | -0.136<br>(1.402)                               | -0.004<br>(1.337)    |
| Age of household head (HH) (years)          | -0.425<br>(0.255)                           | -0.410<br>(0.264)    | 0.684*<br>(0.359)                                 | 0.653*<br>(0.358)   | -0.259<br>(0.364)                               | -0.242<br>(0.305)    |
| Age of HH-squared (years)                   | 0.005*<br>(0.003)                           | 0.005*<br>(0.003)    | -0.008*<br>(0.004)                                | -0.008**<br>(0.004) | 0.003<br>(0.004)                                | 0.003<br>(0.003)     |
| Education of HH (years)                     | -0.140<br>(0.184)                           | -0.179<br>(0.289)    | 0.726***<br>(0.214)                               | 0.808**<br>(0.371)  | -0.585***<br>(0.120)                            | -0.630**<br>(0.302)  |
| Household size (individuals)                | 0.385<br>(0.386)                            | 0.399<br>(0.422)     | -1.159**<br>(0.417)                               | -1.189**<br>(0.539) | 0.774**<br>(0.349)                              | 0.790*<br>(0.439)    |
| Household income (log)                      | -1.680**<br>(0.708)                         | -1.794*<br>(0.924)   | 1.618*<br>(0.814)                                 | 1.864<br>(1.218)    | 0.062<br>(0.490)                                | -0.070<br>(1.042)    |
| Chewa (dummy)                               | -2.766<br>(2.520)                           | -2.803<br>(2.114)    | 2.575<br>(2.038)                                  | 2.654<br>(2.223)    | 0.191<br>(1.630)                                | 0.149<br>(1.889)     |
| Tonga (dummy)                               | -0.623<br>(1.524)                           | -0.593<br>(1.415)    | 1.078<br>(1.996)                                  | 1.013<br>(2.078)    | -0.455<br>(1.480)                               | -0.420<br>(1.831)    |
| Catholic (dummy)                            | 0.728<br>(1.108)                            | 0.755<br>(1.415)     | -0.105<br>(1.808)                                 | -0.162<br>(1.827)   | -0.623<br>(2.155)                               | -0.592<br>(1.256)    |
| First-stage residual                        |                                             | -0.012<br>(0.062)    |                                                   | 0.026<br>(0.085)    |                                                 | -0.014<br>(0.067)    |
| Constant                                    | 51.226***<br>(7.804)                        | 51.826***<br>(9.299) | 6.935<br>(8.830)                                  | 5.642<br>(10.657)   | 41.839***<br>(10.118)                           | 42.532***<br>(9.401) |
| Joint F-statistic/Wald $\chi^2$             | 9***                                        | 72***                | 12***                                             | 81***               | 5**                                             | 18*                  |
| R <sup>2</sup>                              | 0.135                                       | 0.135                | 0.127                                             | 0.127               | 0.033                                           | 0.033                |
| N                                           | 475                                         | 475                  | 475                                               | 475                 | 475                                             | 475                  |

OLS (ordinary least squares) and control function (CF) estimates are shown with robust and bootstrapped standard errors clustered at compound level in parentheses, respectively. Bemba and Protestant are used as reference group for ethnicity—Chewa and Tonga, and religion status—Catholic, respectively. \*  $p < 0.10$ , \*\*  $p < 0.05$ , \*\*\*  $p < 0.01$ . N, number of observations (households).

**Table S9.** Effects of modern retailers on dietary composition in terms of food processing levels (alternative model specifications)

|                                                                      | <b>Unprocessed Foods</b> | <b>Primary Processed Foods</b> | <b>Ultra-Processed Foods</b> |
|----------------------------------------------------------------------|--------------------------|--------------------------------|------------------------------|
|                                                                      | (expenditure share, %)   | (expenditure share, %)         | (expenditure share, %)       |
|                                                                      | (1)                      | (2)                            | (3)                          |
| <i>Estimated with Heckman selection model</i>                        |                          |                                |                              |
| Modern retail use                                                    | -0.065***                | 0.008                          | 0.079***                     |
| (expenditure share, %)                                               | (0.024)                  | (0.033)                        | (0.027)                      |
| Control variables                                                    | Yes                      | Yes                            | Yes                          |
| N                                                                    | 475                      | 475                            | 475                          |
| <i>Estimated with OLS, only including modern retail users</i>        |                          |                                |                              |
| Modern retail use                                                    | -0.090**                 | 0.010                          | 0.081**                      |
| (expenditure share, %)                                               | (0.035)                  | (0.030)                        | (0.033)                      |
| Control variables                                                    | Yes                      | Yes                            | Yes                          |
| N                                                                    | 360                      | 360                            | 360                          |
| <i>Estimated with OLS, expressing modern retailer use as a dummy</i> |                          |                                |                              |
| Modern retail use                                                    | -2.982*                  | 2.319                          | 0.663                        |
| (dummy)                                                              | (1.630)                  | (2.133)                        | (2.554)                      |
| Control variables                                                    | Yes                      | Yes                            | Yes                          |
| N                                                                    | 475                      | 475                            | 475                          |

Marginal effects are shown with robust standard errors clustered at compound level in parentheses. In all models, the same control variables as shown in Supplementary Table S8 were used in estimation. \*\* p < 0.05, \*\*\* p < 0.01. N, number of household observations.

Table S10. Effects of modern retailers on nutritional status (full model results for Table 4)

|                                       | Adults (≥18 years) |                   | Children (<18 years) |                   |           | Adults (≥18 years) |                   | Children (<18 years) |                   |           |
|---------------------------------------|--------------------|-------------------|----------------------|-------------------|-----------|--------------------|-------------------|----------------------|-------------------|-----------|
|                                       | BMI                | Overweight /Obese | BAZ                  | Overweight /Obese | HAZ       | BMI                | Overweight /Obese | BAZ                  | Overweight /Obese | HAZ       |
|                                       | OLS                | Probit            | OLS                  | Probit            | OLS       | CF                 | CF                | CF                   | CF                | CF        |
|                                       | (1)                | (2)               | (3)                  | (4)               | (5)       | (6)                | (7)               | (8)                  | (9)               | (10)      |
| Modern retail use                     | 0.012**            | 0.004***          | 0.001                | -0.002            | 0.006**   | 0.004              | 0.003             | -0.011               | -0.016**          | 0.026***  |
| (expenditure share, %)                | (0.005)            | -0.002            | (0.002)              | (0.004)           | (0.003)   | (0.014)            | (0.005)           | (0.008)              | (0.007)           | (0.008)   |
| Male (dummy)                          | -0.900**           | -0.284***         | 0.558**              | 0.410*            | -0.083    | -0.930***          | -0.290**          | 0.566***             | 0.440**           | -0.097    |
|                                       | (0.349)            | (0.104)           | (0.217)              | (0.228)           | (0.186)   | (0.341)            | (0.117)           | (0.190)              | (0.179)           | (0.206)   |
| Age (years)                           | 0.374***           | 0.101***          | -0.154**             | -0.144            | 0.273***  | 0.371***           | 0.101***          | -0.132*              | -0.116            | 0.236***  |
|                                       | (0.062)            | (0.022)           | (0.067)              | (0.094)           | (0.063)   | (0.054)            | (0.016)           | (0.074)              | (0.076)           | (0.077)   |
| Age-squared (years)                   | -0.003***          | -0.001***         | 0.003                | 0.003             | -0.022*** | -0.003***          | -0.001***         | 0.002                | 0.002             | -0.020*** |
|                                       | (0.001)            | (0.0002)          | (0.003)              | (0.004)           | (0.002)   | (0.001)            | (0.000)           | (0.004)              | (0.004)           | (0.004)   |
| Education (years)                     | -0.099             | -0.0003           | 0.127**              | 0.111**           | 0.114**   | -0.077             | 0.004             | 0.130***             | 0.113*            | 0.109**   |
|                                       | (0.080)            | (0.017)           | (0.045)              | (0.050)           | (0.053)   | (0.070)            | (0.023)           | (0.040)              | (0.060)           | (0.049)   |
| Household size (individuals)          | 0.086              | 0.020             | -0.022               | -0.036            | 0.005     | 0.071              | 0.017             | -0.038               | -0.058            | 0.029     |
|                                       | (0.073)            | (0.030)           | (0.041)              | (0.049)           | (0.047)   | (0.104)            | (0.029)           | (0.047)              | (0.052)           | (0.047)   |
| Income (log)                          | 0.079              | 0.039             | 0.025                | 0.064             | -0.055    | 0.172              | 0.056             | 0.205                | 0.283**           | -0.365*** |
|                                       | (0.206)            | (0.056)           | (0.112)              | (0.094)           | (0.066)   | (0.247)            | (0.077)           | (0.146)              | (0.127)           | (0.140)   |
| Chewa (dummy)                         | 0.061              | 0.278             | -0.220               | -0.315*           | -0.085    | 0.061              | 0.278**           | -0.263               | -0.396            | -0.006    |
|                                       | (0.555)            | (0.183)           | (0.182)              | (0.165)           | (0.136)   | (0.412)            | (0.134)           | (0.214)              | (0.250)           | (0.148)   |
| Tonga (dummy)                         | 0.373              | 0.145             | 0.088                | -0.151            | 0.014     | 0.334              | 0.137             | 0.092                | -0.152            | 0.015     |
|                                       | (0.449)            | (0.106)           | (0.193)              | (0.211)           | (0.236)   | (0.404)            | (0.119)           | (0.217)              | (0.203)           | (0.249)   |
| Catholic (dummy)                      | 0.387              | 0.025             | 0.018                | 0.018             | -0.105    | 0.367              | 0.022             | -0.061               | -0.068            | 0.036     |
|                                       | (0.275)            | (0.113)           | (0.174)              | (0.200)           | (0.170)   | (0.301)            | (0.110)           | (0.158)              | (0.197)           | (0.146)   |
| Physical activity ratio               | -0.843***          | -0.215***         | -0.140***            | -0.111**          | -0.086*   | -0.840***          | -0.215***         | -0.132***            | -0.107**          | -0.098**  |
|                                       | (0.120)            | (0.031)           | (0.038)              | (0.052)           | (0.048)   | (0.116)            | (0.039)           | (0.036)              | (0.043)           | (0.041)   |
| Piped drinking water                  |                    |                   |                      |                   | 0.263     |                    |                   |                      |                   | 0.214     |
|                                       |                    |                   |                      |                   | (0.335)   |                    |                   |                      |                   | (0.222)   |
| Non-chronic infections                |                    |                   |                      |                   | -0.239    |                    |                   |                      |                   | -0.182    |
|                                       |                    |                   |                      |                   | (0.139)   |                    |                   |                      |                   | (0.149)   |
| Distance to the nearest hospital (km) |                    |                   |                      |                   | -0.039*   |                    |                   |                      |                   | -0.038*   |
|                                       |                    |                   |                      |                   | (0.021)   |                    |                   |                      |                   | (0.022)   |
| Constant                              | 19.016***          | -2.420***         | 0.628                | -0.549            | -0.631    | 18.353***          | -2.548***         | -0.613               | -2.049**          | 1.527     |
|                                       | (2.341)            | (0.595)           | (1.068)              | (1.096)           | (0.807)   | (2.360)            | (0.756)           | (1.223)              | (0.997)           | (1.062)   |
| First-stage residual                  |                    |                   |                      |                   |           | 0.008              | 0.002             | 0.013*               | 0.016**           | -0.023*** |
|                                       |                    |                   |                      |                   |           | (0.015)            | (0.005)           | (0.007)              | (0.007)           | (0.008)   |
| Joint F-statistic/Wald $\chi^2$       | 761***             | 862***            | 37***                | 192***            |           | 327***             | 162***            | 66***                | 35***             | 117***    |
| R <sup>2</sup> /Pseudo-R <sup>2</sup> | 0.220              | 0.146             | 0.057                | 0.046             | 0.133     | 0.220              | 0.147             | 0.063                | 0.055             | 0.151     |
| N                                     | 863                | 863               | 458                  | 458               | 472       | 863                | 863               | 458                  | 458               | 472       |

Coefficient estimates are shown with robust, bootstrapped standard errors clustered at compound level in parentheses. OLS estimator. Bemba and Protestant are used as reference group for ethnicity—Chewa and Tonga, and religion status—Catholic, respectively. \* p < 0.10, \*\* p < 0.05, \*\*\* p < 0.01.

**Table S11.** Effects of modern retailers on nutritional status (Heckman selection model results)

|                        | Adults ( $\geq 18$ years) |                      | Children ( $< 18$ years) |                      |         |
|------------------------|---------------------------|----------------------|--------------------------|----------------------|---------|
|                        | BMI                       | Overweight/<br>Obese | BAZ                      | Overweight/<br>Obese | HAZ     |
|                        | (1)                       | (2)                  | (3)                      | (4)                  | (5)     |
| Modern retail use      | 0.014**                   | 0.002**              | -0.001                   | -0.001               | 0.007** |
| (expenditure share, %) | (0.006)                   | (0.001)              | (0.003)                  | (0.056)              | (0.003) |
| Control variables      | Yes                       | Yes                  | Yes                      | Yes                  | Yes     |
| N                      | 872                       | 872                  | 470                      | 470                  | 479     |

Coefficient estimates are shown with robust standard errors in parentheses. In all models, the same control variables as shown in Supplementary Table S10 were used in estimation. \*\*  $p < 0.05$ .

**Table S12.** Effects of modern retailers on adult dietary diversity (full model results for Figure 2)

|                              | HEI<br>Score<br>(0–100)<br>Poisson | FVS<br>Score<br>(0–18)<br>Poisson | DDS<br>Score<br>(0–9)<br>Poisson | HEI<br>Score<br>(0–100)<br>CF | FVS<br>Score<br>(0–18)<br>CF | DDS<br>Score<br>(0–9)<br>CF |
|------------------------------|------------------------------------|-----------------------------------|----------------------------------|-------------------------------|------------------------------|-----------------------------|
|                              | (1)                                | (2)                               | (3)                              | (4)                           | (5)                          | (6)                         |
| Modern retail use<br>(dummy) | 1.109***<br>(0.039)                | 1.038<br>(0.026)                  | 1.040<br>(0.041)                 | 1.193***<br>(0.041)           | 1.102**<br>(0.039)           | 1.118**<br>(0.039)          |
| Male                         | –0.994<br>(0.027)                  | –0.995<br>(0.021)                 | 1.019<br>(0.027)                 | 1.001<br>(0.022)              | 1.001<br>(0.020)             | 1.025<br>(0.024)            |
| Age                          | –0.999<br>(0.004)                  | 1.001<br>(0.003)                  | –0.999<br>(0.003)                | –0.999<br>(0.004)             | 1.001<br>(0.003)             | –0.999<br>(0.004)           |
| Age-squared                  | 1.000<br>(0.00005)                 | –1.000<br>(0.003)                 | 1.000<br>(0.00004)               | –1.000<br>(0.00004)           | –1.000<br>(0.00003)          | 1.000<br>(0.00004)          |
| Education                    | –0.990*<br>(0.005)                 | –0.999<br>(0.004)                 | –0.999<br>(0.005)                | –0.988**<br>(0.005)           | –0.997<br>(0.003)            | –0.997<br>(0.003)           |
| Household size               | –0.994<br>(0.008)                  | 1.004<br>(0.008)                  | 1.008<br>(0.006)                 | –0.993<br>(0.008)             | 1.003<br>(0.007)             | 1.007<br>(0.007)            |
| Income                       | 1.012<br>(0.016)                   | 1.023*<br>(0.013)                 | 1.007<br>(0.013)                 | 1.003<br>(0.011)              | 1.016<br>(0.010)             | –0.998<br>(0.012)           |
| Chewa                        | 1.027<br>(0.036)                   | 1.049<br>(0.031)                  | 1.057<br>(0.039)                 | 1.029<br>(0.033)              | 1.050<br>(0.034)             | 1.059<br>(0.038)            |
| Tonga                        | 1.078**<br>(0.037)                 | 1.049<br>(0.033)                  | 1.024<br>(0.036)                 | 1.084***<br>(0.026)           | 1.054**<br>(0.023)           | 1.030<br>(0.024)            |
| Catholic                     | 1.053<br>(0.034)                   | 1.027<br>(0.026)                  | 1.067**<br>(0.021)               | 1.056**<br>(0.028)            | 1.030<br>(0.026)             | 1.070***<br>(0.024)         |
| Constant                     | 30.469***<br>(0.034)               | 4.845***<br>(0.699)               | 2.777***<br>(0.354)              | 32.133***<br>(4.518)          | 5.061***<br>(0.543)          | 2.931***<br>(0.391)         |
| First-stage residual         |                                    |                                   |                                  | –0.998***<br>(0.0004)         | –0.998***<br>(0.0004)        | –0.998***<br>(0.001)        |
| Wald $\chi^2$                | 123***                             | 130***                            | 56***                            | 56***                         | 41***                        | 43***                       |
| Pseudo-R <sup>2</sup>        | 0.013                              | 0.003                             | 0.002                            | 0.021                         | 0.005                        | 0.004                       |
| N                            | 930                                | 930                               | 930                              | 930                           | 930                          | 930                         |

Incidence rate ratios are shown with bootstrapped standard errors clustered at compound level in parentheses. For Figure 2, incidence ratios and standard errors were converted for percentage interpretation. CF, control function approach; HEI, healthy eating index; FVS, food variety score; DDS, dietary diversity score. Bemba and Protestant are used as a reference group for ethnicity—Chewa and Tonga, and religion status—Catholic, respectively. \*  $p < 0.10$ , \*\*  $p < 0.05$ , \*\*\*  $p < 0.01$ .

**Table S13.** Effects of modern retailers on child dietary diversity (full model results for Figure 2)

|                              | HEI<br>Score<br>(0–100)<br>Poisson | FVS<br>Score<br>(0–18)<br>Poisson | DDS<br>Score<br>(0–9)<br>Poisson | HEI<br>Score<br>(0–100)<br>CF | FVS<br>Score<br>(0–18)<br>CF | DDS<br>Score<br>(0–9)<br>CF |
|------------------------------|------------------------------------|-----------------------------------|----------------------------------|-------------------------------|------------------------------|-----------------------------|
|                              | (1)                                | (2)                               | (3)                              | (4)                           | (5)                          | (6)                         |
| Modern retail use<br>(dummy) | 1.109***<br>(0.033)                | 1.049<br>(0.036)                  | –0.974<br>(0.039)                | 1.165***<br>(0.053)           | 1.049<br>(0.034)             | 1.014<br>(0.042)            |
| Male                         | 1.075***<br>(0.025)                | –0.998<br>(0.019)                 | 1.054*<br>(0.031)                | 1.075**<br>(0.033)            | –0.998<br>(0.025)            | 1.054<br>(0.034)            |
| Age                          | 1.061***<br>(0.021)                | 1.025**<br>(0.010)                | 1.032**<br>(0.014)               | 1.061***<br>(0.018)           | 1.025*<br>(0.015)            | 1.031<br>(0.017)            |
| Age-squared                  | –0.998*<br>(0.001)                 | –0.999<br>(0.001)                 | –0.999<br>(0.001)                | –0.998**<br>(0.001)           | –0.999<br>(0.001)            | –0.999<br>(0.001)           |
| Education                    | –0.997<br>(0.018)                  | –0.983<br>(0.015)                 | –0.980<br>(0.014)                | –0.996<br>(0.012)             | –0.983<br>(0.014)            | –0.979*<br>(0.011)          |
| Household size               | –0.999<br>(0.010)                  | 1.021***<br>(0.007)               | 1.020**<br>(0.009)               | –0.999<br>(0.012)             | 1.021**<br>(0.009)           | 1.020**<br>(0.010)          |
| Income                       | 1.017<br>(0.020)                   | 1.040**<br>(0.018)                | 1.030<br>(0.021)                 | 1.010<br>(0.013)              | 1.040***<br>(0.011)          | 1.023**<br>(0.012)          |
| Chewa                        | 1.118**<br>(0.060)                 | 1.097*<br>(0.052)                 | 1.162***<br>(0.062)              | 1.122**<br>(0.051)            | 1.097***<br>(0.034)          | 1.165***<br>(0.054)         |
| Tonga                        | 1.086<br>(0.065)                   | 1.095***<br>(0.034)               | 1.068**<br>(0.031)               | 1.092*<br>(0.049)             | 1.095***<br>(0.037)          | 1.072*<br>(0.043)           |
| Catholic                     | 1.055**<br>(0.027)                 | 1.053**<br>(0.026)                | 1.019<br>(0.032)                 | 1.063*<br>(0.035)             | 1.053**<br>(0.025)           | 1.025<br>(0.031)            |
| Constant                     | 17.303***<br>(3.180)               | 3.495***<br>(0.510)               | 1.745***<br>(0.339)              | 17.861***<br>(2.673)          | 3.493***<br>(0.440)          | 1.794***<br>(0.241)         |
| First-stage residual         |                                    |                                   |                                  | –0.999**<br>(0.001)           | 1.000<br>(0.001)             | –0.999*<br>(0.001)          |
| Wald $\chi^2$                | 216***                             | 47***                             | 259***                           | 53***                         | 57***                        | 42***                       |
| Pseudo-R <sup>2</sup>        | 0.040                              | 0.009                             | 0.007                            | 0.043                         | 0.009                        | 0.008                       |
| N                            | 499                                | 499                               | 499                              | 499                           | 499                          | 499                         |

Incidence rate ratios are shown with bootstrapped standard errors clustered at compound level in parentheses. For Figure 2, incidence ratios and standard errors were converted for percentage interpretation. CF, control function approach; HEI, healthy eating index; FVS, food variety score; DDS, dietary diversity score. Bemba and Protestant are used as a reference group for ethnicity—Chewa and Tonga, and religion status—Catholic, respectively. \* p < 0.10, \*\* p < 0.05, \*\*\* p < 0.01.



**Table S14.** Effects of modern retailers on adult calorie and nutrient intakes (full model results for Figure 3)

|                                             | Calorie<br>(kcal/day)<br>Tobit<br>(1) | Protein<br>(g/day)<br>Tobit<br>(2) | Iron<br>(mg/day)<br>Tobit<br>(3) | Zinc<br>(mg/day)<br>Tobit<br>(4) | Vitamin A<br>(µg/day)<br>Tobit<br>(5) | Calorie<br>(kcal/day)<br>CF<br>(6) | Protein<br>(g/day)<br>CF<br>(7) | Iron<br>(mg/day)<br>CF<br>(8) | Zinc<br>(mg/day)<br>CF<br>(9) | Vitamin A<br>(µg/day)<br>CF<br>(10) |
|---------------------------------------------|---------------------------------------|------------------------------------|----------------------------------|----------------------------------|---------------------------------------|------------------------------------|---------------------------------|-------------------------------|-------------------------------|-------------------------------------|
| Modern retail use<br>(expenditure share, %) | 3.556***<br>(0.916)                   | 0.096**<br>(0.046)                 | 0.028**<br>(0.013)               | 0.008**<br>(0.004)               | 0.697*<br>(0.409)                     | 13.286***<br>(3.517)               | 0.604***<br>(0.099)             | 0.164***<br>(0.037)           | 0.037***<br>(0.010)           | 1.267*<br>(0.739)                   |
| Male                                        | 269.499***<br>(71.397)                | 6.759***<br>(1.470)                | 1.466***<br>(0.331)              | 0.666***<br>(0.224)              | -14.677<br>(26.302)                   | 306.203***<br>(77.809)             | 8.705***<br>(2.183)             | 2.073***<br>(0.674)           | 0.773***<br>(0.223)           | 9.006<br>(13.645)                   |
| Age                                         | 21.424*<br>(12.323)                   | 0.639<br>(0.409)                   | 0.029<br>(0.091)                 | 0.085**<br>(0.034)               | -0.275<br>(3.036)                     | 25.303***<br>(9.497)               | 0.848**<br>(0.382)              | 0.088<br>(0.092)              | 0.096***<br>(0.032)           | 1.795<br>(2.243)                    |
| Age-squared                                 | -0.305**<br>(0.132)                   | -0.008*<br>(0.005)                 | -0.001<br>(0.001)                | -0.001***<br>(0.0004)            | -0.009<br>(0.036)                     | -0.347***<br>(0.106)               | -0.010**<br>(0.005)             | -0.001<br>(0.001)             | -0.001***<br>(0.0004)         | -0.024<br>(0.027)                   |
| Education                                   | -22.152***<br>(8.361)                 | -0.755***<br>(0.244)               | -0.087<br>(0.074)                | -0.059*<br>(0.033)               | 4.750<br>(2.966)                      | -50.816***<br>(17.861)             | -2.256***<br>(0.547)            | -0.480***<br>(0.154)          | -0.144***<br>(0.053)          | -0.308<br>(3.107)                   |
| Household size                              | -40.738<br>(36.400)                   | -3.180**<br>(1.305)                | -0.388<br>(0.250)                | -0.253**<br>(0.117)              | -14.600**<br>(5.918)                  | -19.778<br>(22.973)                | -2.080***<br>(0.739)            | -0.100<br>(0.202)             | -0.192***<br>(0.072)          | -7.428*<br>(3.896)                  |
| Income                                      | 45.815<br>(37.039)                    | 1.182<br>(1.035)                   | 0.205<br>(0.356)                 | 0.040<br>(0.106)                 | 22.066<br>(13.680)                    | -76.970<br>(52.564)                | -5.222***<br>(1.522)            | -1.514***<br>(0.542)          | -0.322**<br>(0.158)           | 1.923<br>(10.781)                   |
| Chewa                                       | -178.209*<br>(95.287)                 | 0.603<br>(4.727)                   | 0.044<br>(1.063)                 | -0.364<br>(0.434)                | -7.026<br>(21.073)                    | -180.927*<br>(100.034)             | 0.425<br>(3.692)                | -0.063<br>(1.029)             | -0.370<br>(0.339)             | 9.029<br>(20.210)                   |
| Tonga                                       | 162.359**<br>(81.023)                 | 10.934***<br>(2.299)               | 2.943***<br>(0.773)              | 0.540**<br>(0.269)               | 4.938<br>(26.619)                     | 212.855**<br>(96.257)              | 13.568***<br>(2.922)            | 3.739***<br>(0.938)           | 0.688**<br>(0.325)            | 23.457<br>(17.390)                  |
| Catholic                                    | 109.489<br>(71.476)                   | 7.143**<br>(2.925)                 | 1.091<br>(0.751)                 | 0.593**<br>(0.246)               | 72.108*<br>(37.249)                   | 134.599*<br>(81.645)               | 8.469***<br>(2.691)             | 1.466**<br>(0.747)            | 0.667**<br>(0.263)            | 41.942***<br>(14.340)               |
| Constant                                    | 1990.091***<br>(602.489)              | 70.085***<br>(16.065)              | 17.915***<br>(3.279)             | 6.350***<br>(1.622)              | 164.583<br>(149.339)                  | 2854.905***<br>(501.210)           | 115.080***<br>(15.024)          | 29.946***<br>(4.638)          | 8.902***<br>(1.639)           | 190.720**<br>(94.957)               |
| First-stage residual                        |                                       |                                    |                                  |                                  |                                       | -11.004***<br>(3.836)              | -0.574***<br>(0.108)            | -0.150***<br>(0.039)          | -0.033***<br>(0.011)          | -0.637<br>(0.787)                   |
| Joint F-statistic                           | 11***                                 | 202***                             | 43***                            | 8***                             | 12***                                 |                                    |                                 |                               |                               |                                     |
| Wald $\chi^2$                               |                                       |                                    |                                  |                                  |                                       | 103***                             | 199***                          | 78***                         | 98***                         | 88***                               |
| Pseudo-R <sup>2</sup>                       | 0.004                                 | 0.010                              | 0.024                            | 0.011                            | 0.006                                 | 0.004                              | 0.013                           | 0.033                         | 0.012                         | 0.009                               |
| N                                           | 930                                   | 930                                | 930                              | 930                              | 930                                   | 930                                | 930                             | 930                           | 930                           | 930                                 |

Coefficient estimates are shown with bootstrapped standard errors clustered at compound level in parentheses. Estimates for modern retail use can be interpreted as marginal effects of a 1 percentage point increase in the modern retail expenditure share. For Figure 3, coefficients and standard errors were multiplied by 10, to show effects of a 10 percentage point increase in the modern retail expenditure share. CF, control function approach. Bamba and Protestant are used as reference group for ethnicity—Chewa and Tonga, and religion status—Catholic, respectively. \* p < 0.10, \*\* p < 0.05, \*\*\* p < 0.01.

**Table S15.** Effects of modern retailers on child calorie and nutrient intakes (full model results for Figure 3)

|                        | Calorie<br>(kcal/day) | Protein<br>(g/day) | Iron<br>(mg/day) | Zinc<br>(mg/day) | Vitamin A<br>(µg/day) | Calorie<br>(kcal/day) | Protein<br>(g/day) | Iron<br>(mg/day) | Zinc<br>(mg/day) | Vitamin A<br>(µg/day) |
|------------------------|-----------------------|--------------------|------------------|------------------|-----------------------|-----------------------|--------------------|------------------|------------------|-----------------------|
|                        | Tobit                 | Tobit              | Tobit            | Tobit            | Tobit                 | CF                    | CF                 | CF               | CF               | CF                    |
|                        | (1)                   | (2)                | (3)              | (4)              | (5)                   | (6)                   | (7)                | (8)              | (9)              | (10)                  |
| Modern retail use      | 2.455*                | 0.018              | 0.021**          | 0.010**          | 0.405                 | 9.662**               | 0.346***           | 0.114***         | 0.027**          | 1.293*                |
| (expenditure share, %) | (1.413)               | (0.061)            | (0.009)          | (0.004)          | (0.653)               | (3.865)               | (0.128)            | (0.035)          | (0.014)          | (0.756)               |
| Male                   | 139.026**             | 5.023              | 1.032**          | 0.315            | 12.135                | 107.787               | 4.059              | 1.445**          | 0.270            | -0.908                |
|                        | (69.052)              | (3.727)            | (0.485)          | (0.317)          | (20.830)              | (67.943)              | (2.474)            | (0.628)          | (0.224)          | (16.540)              |
| Age                    | 197.369***            | 6.622***           | 2.087***         | 0.660***         | -10.283               | 166.034***            | 5.965***           | 1.756***         | 0.626***         | -10.561               |
|                        | (23.568)              | (1.047)            | (0.414)          | (0.130)          | (9.907)               | (36.470)              | (1.233)            | (0.332)          | (0.131)          | (8.765)               |
| Age-squared            | -7.327***             | -0.198***          | -0.082***        | -0.019**         | 0.413                 | -5.845***             | -0.162***          | -0.057***        | -0.017**         | 0.370                 |
|                        | (1.236)               | (0.064)            | (0.015)          | (0.007)          | (0.516)               | (2.030)               | (0.063)            | (0.019)          | (0.007)          | (0.445)               |
| Education              | 8.979                 | -0.336             | -0.239           | -0.049           | 6.473                 | 4.290                 | -0.423             | -0.100           | -0.052           | 6.454                 |
|                        | (34.658)              | (0.779)            | (0.372)          | (0.044)          | (10.394)              | (33.179)              | (0.936)            | (0.276)          | (0.084)          | (5.801)               |
| Household size         | 3.084                 | -0.783             | -0.080           | -0.138           | -26.300***            | 13.519                | -0.358             | -0.141           | -0.117           | -11.612**             |
|                        | (27.250)              | (1.087)            | (0.248)          | (0.124)          | (7.226)               | (24.648)              | (0.701)            | (0.222)          | (0.073)          | (4.932)               |
| Income                 | 38.802                | 0.856              | 0.035            | 0.083            | 59.428***             | -76.856               | -4.171**           | -1.348**         | -0.180           | 16.124                |
|                        | (62.287)              | (0.965)            | (0.411)          | (0.096)          | (13.054)              | (65.738)              | (2.078)            | (0.557)          | (0.245)          | (14.000)              |
| Chewa                  | 86.984                | 8.839              | -1.169           | 0.313            | 41.493                | 111.387               | 10.019**           | 1.307            | 0.368            | 41.133                |
|                        | (223.630)             | (5.999)            | (1.227)          | (0.427)          | (50.216)              | (112.804)             | (4.131)            | (1.020)          | (0.413)          | (26.894)              |
| Tonga                  | -52.352               | 6.526              | 0.006            | 0.243            | 1.015                 | -37.812               | 6.698*             | 0.974            | 0.245            | 23.155                |
|                        | (113.153)             | (5.805)            | (0.530)          | (0.386)          | (44.334)              | (106.656)             | (3.495)            | (0.922)          | (0.370)          | (17.906)              |
| Catholic               | 95.974                | 3.274              | 0.657            | 0.445            | 42.909                | 124.233               | 5.349*             | 2.245**          | 0.554*           | 29.816                |
|                        | (126.386)             | (3.647)            | (0.966)          | (0.393)          | (36.907)              | (98.235)              | (3.084)            | (0.945)          | (0.323)          | (21.011)              |
| Constant               | 272.873               | 12.095             | 2.892            | 0.454            | -84.023               | 1124.865**            | 46.557***          | 13.317***        | 2.259            | 135.035               |
|                        | (518.702)             | (8.614)            | (3.629)          | (1.081)          | (117.647)             | (522.421)             | (16.289)           | (4.423)          | (2.057)          | (117.268)             |
| First-stage residual   |                       |                    |                  |                  |                       | -8.618**              | -0.371***          | -0.113***        | -0.019           | -1.105                |
|                        |                       |                    |                  |                  |                       | (4.191)               | (0.130)            | (0.037)          | (0.014)          | (0.866)               |
| Joint F-statistic      | 37***                 | 108***             | 29***            | 64***            | 10***                 |                       |                    |                  |                  |                       |
| Wald $\chi^2$          |                       |                    |                  |                  |                       | 130***                | 203***             | 163***           | 194***           | 89***                 |
| Pseudo-R <sup>2</sup>  | 0.044                 | 0.030              | 0.134            | 0.057            | 0.011                 | 0.041                 | 0.031              | 0.081            | 0.058            | 0.013                 |
| N                      | 499                   | 499                | 499              | 499              | 499                   | 499                   | 499                | 499              | 499              | 499                   |

Coefficient estimates are shown with bootstrapped standard errors clustered at compound level in parentheses. Estimates for modern retail use can be interpreted as marginal effects of a 1 percentage point increase in the modern retail expenditure share. For Figure 3, coefficients and standard errors were multiplied by 10, to show effects of a 10 percentage point increase in the modern retail expenditure share. CF, control function approach. Bembas and Protestant are used as reference group for ethnicity—Chewa and Tonga, and religion status—Catholic, respectively. \* p < 0.10, \*\* p < 0.05, \*\*\* p < 0.01.

**Table S16.** Effects of modern retailers on adult micronutrient adequacy ratios

|                                             | Micronutrient Adequacy Ratio |                        |                        |                       |
|---------------------------------------------|------------------------------|------------------------|------------------------|-----------------------|
|                                             | Mean Adequacy Ratio          | Iron                   | Zinc                   | Vitamin A             |
|                                             | (1)                          | (2)                    | (3)                    | (4)                   |
| Modern retail use<br>(expenditure share, %) | 0.245***<br>(0.046)          | 1.073***<br>(0.283)    | 0.386*<br>(0.230)      | -0.033<br>(0.660)     |
| Male                                        | 3.739***<br>(1.117)          | 91.887***<br>(7.163)   | -40.047***<br>(5.657)  | -23.791*<br>(12.423)  |
| Age                                         | -0.344**<br>(0.171)          | -4.543***<br>(1.150)   | 1.120<br>(0.789)       | 1.057<br>(1.988)      |
| Age-squared                                 | 0.003*<br>(0.002)            | 0.060***<br>(0.014)    | -0.016*<br>(0.008)     | -0.020<br>(0.023)     |
| Education                                   | -0.563*<br>(0.288)           | -3.450**<br>(1.431)    | -1.553<br>(1.199)      | 3.983<br>(2.642)      |
| Household size                              | -0.545<br>(0.465)            | -3.071*<br>(1.752)     | -4.171***<br>(1.339)   | -6.718*<br>(3.503)    |
| Income                                      | -0.688<br>(0.859)            | -10.273***<br>(3.761)  | -5.625*<br>(3.340)     | 15.838<br>(10.274)    |
| Chewa                                       | -0.827<br>(2.194)            | -3.285<br>(8.198)      | -5.520<br>(7.358)      | -27.278*<br>(14.103)  |
| Tonga                                       | 3.019**<br>(1.237)           | 32.493***<br>(8.499)   | 7.424<br>(8.037)       | -2.784<br>(16.177)    |
| Catholic                                    | 2.190<br>(1.389)             | 16.228***<br>(5.854)   | 11.188*<br>(5.967)     | 34.900***<br>(12.633) |
| Constant                                    | 99.622***<br>(8.760)         | 309.095***<br>(38.222) | 175.356***<br>(34.081) | 4.742<br>(90.443)     |
| First-stage residual                        | -0.210***<br>(0.050)         | -0.997***<br>(0.289)   | -0.321<br>(0.246)      | 0.210<br>(0.718)      |
| Wald $\chi^2$ (11)                          | 142***                       | 296***                 | 121***                 | 73***                 |
| R <sup>2</sup>                              | 0.093                        | 0.233                  | 0.070                  | 0.053                 |
| N                                           | 930                          | 930                    | 930                    | 930                   |

Coefficient estimates from control function models are shown with bootstrapped standard errors clustered at compound level in parentheses. \*  $p < 0.10$ , \*\*  $p < 0.05$ , \*\*\*  $p < 0.01$ .

**Table S17.** Effects of modern retailers on child micronutrient adequacy ratios

|                        | Micronutrient Adequacy Ratio |            |            |           |
|------------------------|------------------------------|------------|------------|-----------|
|                        | Mean Adequacy Ratio          | Iron       | Zinc       | Vitamin A |
|                        | (1)                          | (2)        | (3)        | (4)       |
| Modern retail use      | 0.179***                     | 1.380**    | 0.849**    | 0.072     |
| (expenditure share, %) | (0.069)                      | (0.659)    | (0.428)    | (0.945)   |
| Male                   | 2.823**                      | 25.477**   | 0.283      | 11.346    |
|                        | (1.408)                      | (12.476)   | (7.283)    | (17.115)  |
| Age                    | 0.800                        | 10.011*    | -11.086*** | -17.490*  |
|                        | (0.997)                      | (5.237)    | (3.748)    | (9.156)   |
| Age-squared            | -0.028                       | -0.113     | 0.473***   | 0.606     |
|                        | (0.043)                      | (0.283)    | (0.168)    | (0.460)   |
| Education              | -0.082                       | -1.419     | -4.091*    | -1.268    |
|                        | (0.482)                      | (3.613)    | (2.323)    | (4.630)   |
| Household size         | -0.383                       | -5.487*    | -2.659     | -11.848** |
|                        | (0.555)                      | (3.190)    | (2.119)    | (5.390)   |
| Income                 | -0.476                       | -21.234**  | -10.676    | 41.194**  |
|                        | (1.316)                      | (10.194)   | (8.768)    | (16.821)  |
| Chewa                  | -0.145                       | 31.016     | 10.337     | 39.890    |
|                        | (2.119)                      | (20.533)   | (11.368)   | (30.429)  |
| Tonga                  | 1.032                        | 43.547**   | 20.892     | -8.811    |
|                        | (1.669)                      | (18.522)   | (18.827)   | (16.828)  |
| Catholic               | 2.497                        | 36.843***  | 13.791     | 5.847     |
|                        | (1.837)                      | (14.034)   | (9.011)    | (20.482)  |
| Constant               | 86.888***                    | 303.276*** | 255.781*** | -61.510   |
|                        | (11.732)                     | (79.592)   | (76.754)   | (137.665) |
| First-stage residual   | -0.165**                     | -1.411**   | -0.676     | 0.420     |
|                        | (0.075)                      | (0.682)    | (0.482)    | (1.019)   |
| Wald $\chi^2$ (11)     | 38***                        | 92***      | 69***      | 78***     |
| R <sup>2</sup>         | 0.067                        | 0.117      | 0.097      | 0.132     |
| N                      | 499                          | 499        | 499        | 499       |

Coefficient estimates from control function models are shown with bootstrapped standard errors clustered at compound level in parentheses. \* p < 0.10, \*\* p < 0.05, \*\*\* p < 0.01.

**Table S18.** Effects of supermarkets on child and adult calorie and nutrient intakes

|                        | <b>Calorie</b><br>(kcal/day) | <b>Protein</b><br>(g/day) | <b>Iron</b><br>(mg/day) | <b>Zinc</b><br>(mg/day) | <b>Vitamin A</b><br>(µg retinol/day) |
|------------------------|------------------------------|---------------------------|-------------------------|-------------------------|--------------------------------------|
|                        | (1)                          | (2)                       | (3)                     | (4)                     | (5)                                  |
| <b>Adults</b>          |                              |                           |                         |                         |                                      |
| Supermarket use        | 10.430***                    | 0.497***                  | 0.139***                | 0.029***                | 1.029**                              |
| (expenditure share, %) | (2.882)                      | (0.094)                   | (0.031)                 | (0.009)                 | (0.488)                              |
| Controls               | Yes                          | Yes                       | Yes                     | Yes                     | Yes                                  |
| First-stage residual   | -7.724**                     | -0.440***                 | -0.118***               | -0.024**                | -0.424                               |
|                        | (3.237)                      | (0.103)                   | (0.034)                 | (0.009)                 | (0.525)                              |
| Wald $\chi^2$ (11)     | 76***                        | 133***                    | 53***                   | 72***                   | 66***                                |
| Pseudo-R <sup>2</sup>  | 0.004                        | 0.013                     | 0.034                   | 0.012                   | 0.009                                |
| N                      | 930                          | 930                       | 930                     | 930                     | 930                                  |
| <b>Children</b>        |                              |                           |                         |                         |                                      |
| Supermarket use        | 8.276**                      | 0.295**                   | 0.102***                | 0.022*                  | 1.106                                |
| (expenditure share, %) | (3.595)                      | (0.119)                   | (0.029)                 | (0.013)                 | (0.722)                              |
| Controls               | Yes                          | Yes                       | Yes                     | Yes                     | Yes                                  |
| First-stage residual   | -8.810**                     | -0.324***                 | -0.104***               | -0.015                  | -0.843                               |
|                        | (3.700)                      | (0.123)                   | (0.033)                 | (0.013)                 | (0.781)                              |
| Wald $\chi^2$ (11)     | 127***                       | 220***                    | 188***                  | 217***                  | 88***                                |
| Pseudo-R <sup>2</sup>  | 0.041                        | 0.031                     | 0.081                   | 0.057                   | 0.013                                |
| N                      | 499                          | 499                       | 499                     | 499                     | 499                                  |

Coefficient estimates from control function models are shown with bootstrapped standard errors clustered at compound level in parentheses. The same control variables as those shown in Supplementary Tables S14 and S15 were included in estimation. \*  $p < 0.10$ , \*\*  $p < 0.05$ , \*\*\*  $p < 0.01$ .

**Table S19.** Effects of modern retailers on calorie and nutrient intakes of individuals from poor households (model results for Figure 4)

|                                             | <b>Calorie</b><br>(kcal/day) | <b>Protein</b><br>(g/day) | <b>Iron</b><br>(mg/day) | <b>Zinc</b><br>(mg/day) | <b>Vitamin A</b><br>(µg retinol/day) |
|---------------------------------------------|------------------------------|---------------------------|-------------------------|-------------------------|--------------------------------------|
|                                             | (1)                          | (2)                       | (3)                     | (4)                     | (5)                                  |
| <b>Adults</b>                               |                              |                           |                         |                         |                                      |
| Modern retail use<br>(expenditure share, %) | 17.070**<br>(7.656)          | 0.757***<br>(0.234)       | 0.244***<br>(0.065)     | 0.045*<br>(0.025)       | 3.615**<br>(1.470)                   |
| Controls                                    | Yes                          | Yes                       | Yes                     | Yes                     | Yes                                  |
| First-stage residual                        | -18.272**<br>(8.971)         | -0.760***<br>(0.277)      | -0.260***<br>(0.073)    | -0.059*<br>(0.034)      | -2.541<br>(1.668)                    |
| Wald $\chi^2$ (11)                          | 14                           | 32***                     | 24**                    | 17***                   | 51***                                |
| Pseudo-R <sup>2</sup>                       | 0.003                        | 0.012                     | 0.026                   | 0.010                   | 0.012                                |
| N                                           | 226                          | 226                       | 226                     | 226                     | 226                                  |
| <b>Children</b>                             |                              |                           |                         |                         |                                      |
| Modern retail use<br>(expenditure share, %) | 22.962***<br>(5.310)         | 0.558***<br>(0.199)       | 0.118**<br>(0.060)      | 0.026<br>(0.026)        | 3.716***<br>(1.096)                  |
| Controls                                    | Yes                          | Yes                       | Yes                     | Yes                     | Yes                                  |
| First-stage residual                        | -22.306***<br>(5.857)        | -0.653***<br>(0.207)      | -0.147**<br>(0.065)     | -0.032<br>(0.030)       | -3.064**<br>(1.250)                  |
| Wald $\chi^2$ (11)                          | 61***                        | 164***                    | 62***                   | 76***                   | 35***                                |
| Pseudo-R <sup>2</sup>                       | 0.058                        | 0.039                     | 0.103                   | 0.057                   | 0.016                                |
| N                                           | 175                          | 175                       | 175                     | 175                     | 175                                  |

Poor households are defined as those with incomes less than \$1.90 per capita and day. Coefficient estimates from control function models are shown with bootstrapped standard errors clustered at compound level in parentheses. The same control variables as those shown in Supplementary Tables S14 and S15 were included in estimation. \*  $p < 0.10$ , \*\*  $p < 0.05$ , \*\*\*  $p < 0.01$ .

**Table S20.** Effects of modern retailers on calorie and nutrient intakes disaggregated by sex

|                          | <b>Calorie</b><br>(kcal/day) | <b>Protein</b><br>(g/day) | <b>Iron</b><br>(mg/day) | <b>Zinc</b><br>(mg/day) | <b>Vitamin A</b><br>(µg/day) |
|--------------------------|------------------------------|---------------------------|-------------------------|-------------------------|------------------------------|
|                          | (1)                          | (2)                       | (3)                     | (4)                     | (5)                          |
| Effects on adult males   | 11.802*<br>(6.963)           | 0.550***<br>(0.201)       | 0.221**<br>(0.106)      | 0.035*<br>(0.019)       | 1.556<br>(0.972)             |
| N                        | 307                          | 307                       | 307                     | 307                     | 307                          |
| Effects on adult females | 13.464***<br>(4.498)         | 0.628***<br>(0.136)       | 0.140***<br>(0.037)     | 0.036***<br>(0.012)     | 1.056<br>(0.816)             |
| N                        | 623                          | 623                       | 623                     | 623                     | 623                          |
| Effects on boys          | 13.375**<br>(6.359)          | 0.238<br>(0.163)          | 0.103**<br>(0.051)      | 0.018<br>(0.019)        | 0.571<br>(1.336)             |
| N                        | 228                          | 228                       | 228                     | 228                     | 228                          |
| Effects on girls         | 7.399<br>(6.419)             | 0.448**<br>(0.218)        | 0.138***<br>(0.052)     | 0.040*<br>(0.023)       | 1.964<br>(1.278)             |
| N                        | 271                          | 271                       | 271                     | 271                     | 271                          |

Coefficient estimates from control function models are shown with bootstrapped standard errors clustered at compound level in parentheses. The treatment variable in all models is the share of total food expenditures (in %) made in modern retailers. The same control variables as those shown in Supplementary Tables S14 and S15 were included in estimation. \*  $p < 0.10$ , \*\*  $p < 0.05$ , \*\*\*  $p < 0.01$ .

**Table S21.** First-stage estimation results on food purchases in modern retailers

|                                                 | Modern Retail Use<br>(expenditure share, %) |                        |
|-------------------------------------------------|---------------------------------------------|------------------------|
|                                                 | Adults                                      | Children               |
|                                                 | (1)                                         | (2)                    |
| Male (dummy)                                    | -4.493**<br>(1.958)                         | 3.666<br>(2.465)       |
| Age of respondent (years)                       | -0.430<br>(0.312)                           | 2.284**<br>(1.161)     |
| Age-squared (years)                             | 0.005<br>(0.004)                            | -0.095<br>(0.065)      |
| Education of respondent (years)                 | 2.611***<br>(0.304)                         | -0.435<br>(0.941)      |
| Household size (individuals)                    | -1.870***<br>(0.561)                        | -0.953<br>(0.840)      |
| Income (log)                                    | 10.992***<br>(0.835)                        | 12.821***<br>(1.100)   |
| Chewa (dummy)                                   | 1.347<br>(2.682)                            | -5.753<br>(3.646)      |
| Tonga (dummy)                                   | -4.961**<br>(2.268)                         | -0.331<br>(3.459)      |
| Catholic (dummy)                                | -3.751*<br>(2.046)                          | -5.233*<br>(2.936)     |
| <i>Instruments</i>                              |                                             |                        |
| High quality food products (dummy)              | 14.463***<br>(2.370)                        | 16.610***<br>(3.571)   |
| Neighbor's shopping mall usage (visits/week)    | 2.397***<br>(0.328)                         | 2.146***<br>(0.447)    |
| Distance to a shopping mall (km)                | -1.132***<br>(0.360)                        | -1.622***<br>(0.493)   |
| Constant                                        | -75.621***<br>(10.594)                      | -88.611***<br>(12.721) |
| Joint significance of instruments: $\chi^2$ (3) | 120***                                      | 64***                  |
| N                                               | 930                                         | 499                    |

Generalized linear models. Standard errors are reported in parentheses. \* p < 0.10, \*\* p < 0.05, \*\*\* p < 0.01.



**Table S22.** Falsification test for instrument validity (Tobit estimates)

|                                                       | <b>BMI</b><br>(kg/m <sup>2</sup> /Z-score) | <b>HAZ</b><br>(Z-score) | <b>Calorie</b><br>(kcal/day) | <b>Protein</b><br>(g/day) | <b>Iron</b><br>(mg/day) | <b>Zinc</b><br>(mg/day) | <b>Vitamin A</b><br>(µg retinol/day) |
|-------------------------------------------------------|--------------------------------------------|-------------------------|------------------------------|---------------------------|-------------------------|-------------------------|--------------------------------------|
|                                                       | (1)                                        | (2)                     | (3)                          | (4)                       | (5)                     | (6)                     | (7)                                  |
| <b>Adults</b>                                         |                                            |                         |                              |                           |                         |                         |                                      |
|                                                       |                                            | NA                      |                              |                           |                         |                         |                                      |
| High quality food products (dummy)                    | -0.079<br>(0.358)                          |                         | 47.512<br>(96.791)           | -0.018<br>(0.302)         | -0.427<br>(1.307)       | -0.073<br>(0.376)       | 0.674<br>(0.696)                     |
| Neighbor's shopping mall usage (visits/week)          | -0.004<br>(0.051)                          |                         | 24.340<br>(18.738)           | 0.040<br>(0.053)          | 0.250<br>(0.205)        | 0.036<br>(0.058)        | -0.057<br>(0.090)                    |
| Household distance to a shopping mall (km)            | 0.023<br>(0.052)                           |                         | 3.231<br>(17.223)            | -0.011<br>(0.049)         | 0.032<br>(0.240)        | -0.012<br>(0.040)       | 0.012<br>(0.065)                     |
| Other controls                                        | Yes                                        |                         | Yes                          | Yes                       | Yes                     | Yes                     | Yes                                  |
| Joint significance of instruments: F (3,853/919)      | 0.10                                       |                         | 1.02                         | 0.47                      | 1.02                    | 0.36                    | 0.35                                 |
| Joint significance of instruments: p-value            | 0.958                                      |                         | 0.385                        | 0.704                     | 0.382                   | 0.785                   | 0.792                                |
| Joint F-statistic                                     | 355***                                     |                         | 16***                        | 3***                      | 16***                   | 15***                   | 15***                                |
| Pseudo-R <sup>2</sup>                                 | 0.038                                      |                         | 0.012                        | 0.044                     | 0.027                   | 0.051                   | 0.070                                |
| N                                                     | 864                                        |                         | 930                          | 930                       | 930                     | 930                     | 930                                  |
| <b>Children</b>                                       |                                            |                         |                              |                           |                         |                         |                                      |
| High quality food products (dummy)                    | -0.275<br>(0.441)                          | 0.145<br>(0.529)        | -38.936<br>(157.455)         | -0.009<br>(0.302)         | 1.068<br>(1.508)        | -2.286<br>(2.022)       | 0.456<br>(0.692)                     |
| Neighbor's shopping mall usage (visits/week)          | -0.124**<br>(0.062)                        | 0.159*<br>(0.083)       | 31.934<br>(21.533)           | 0.080*<br>(0.045)         | 0.126<br>(0.143)        | 0.343*<br>(0.191)       | 0.036<br>(0.076)                     |
| Household distance to a shopping mall (km)            | -0.080<br>(0.054)                          | -0.038<br>(0.067)       | -6.909<br>(15.427)           | -0.025<br>(0.033)         | -0.067<br>(0.131)       | 0.091<br>(0.179)        | -0.034<br>(0.054)                    |
| Other controls                                        | Yes                                        | Yes                     | Yes                          | Yes                       | Yes                     | Yes                     | Yes                                  |
| Joint significance of instruments: F (3, 449/461/488) | 1.66                                       | 1.23                    | 0.99                         | 1.53                      | 0.46                    | 1.73                    | 0.47                                 |
| Joint significance of instruments: p-value            | 0.18                                       | 0.298                   | 0.398                        | 0.205                     | 0.712                   | 0.159                   | 0.704                                |
| Joint F-statistic                                     | 355***                                     | ..                      | 145***                       | 202***                    | 48***                   | 3***                    | 39***                                |
| Pseudo-R <sup>2</sup>                                 | 0.038                                      | 0.165                   | 0.050                        | 0.172                     | 0.139                   | 0.044                   | 0.061                                |
| N                                                     | 460                                        | 472                     | 499                          | 499                       | 499                     | 499                     | 499                                  |

NA, not applicable. Protein and vitamin A intakes were transformed using an inverse hyperbolic sine transformation:  $\ln\{y + (y^2 + 1)^{0.5}\}$ , in order to retain zero-valued observations. Coefficient estimates are shown with robust standard errors clustered at compound level in parentheses. Other controls: age, age-squared, education, household size, log of income, a dummy (1, 0) variable for male, ethnic groups—Chewa, and Tonga, and religion status—Catholic. \*  $p < 0.10$ , \*\*\*  $p < 0.01$ .

## References

1. Steyn, N.P.; Nel, J.H.; Nantel, G.; Kennedy, G.; Labadarios, D. Food variety and dietary diversity scores in children: Are they good indicators of dietary adequacy? *Public Health Nutr.* **2006**, *9*, 644–650, doi:10.1079/phn2005912.
2. Wooldridge, J.M. Control function methods in applied econometrics. *J. Hum. Resour.* **2015**, *50*, 420–445, doi:10.3368/jhr.50.2.420.
3. Wooldridge, J.M. *Econometric Analysis of Cross-Section and Panel Data*, 2nd ed; MIT Press: Cambridge, MA, USA, 2010.
4. Umberger, W.J.; He, X.; Minot, N.; Toiba, H. Examining the relationship between the use of supermarkets and over-nutrition in Indonesia. *Am. J. Agric. Econ.* **2015**, *97*, 510–525, doi:10.1093/ajae/aau111.
5. Kimenju, S.C.; Rischke, R.; Klasen, S.; Qaim, M. Do supermarkets contribute to the obesity pandemic in developing countries? *Public Health Nutr.* **2015**, *18*, 3224–3233, doi:10.1017/s1368980015000919.
6. Debela, B.L.; Demmler, K.M.; Klasen, S.; Qaim, M. Supermarket food purchases and child nutrition in Kenya. *Glob. Food Secur.* **2019**, 100341, doi:10.1016/j.gfs.2019.100341.
7. Rischke, R.; Kimenju, S.C.; Klasen, S.; Qaim, M. Supermarkets and food consumption patterns: The case of small towns in Kenya. *Food Policy* **2015**, *52*, 9–21, doi:10.1016/j.foodpol.2015.02.001.
8. Rupa, J.A.; Umberger, W.J.; Zeng, D. Does food market modernisation lead to improved dietary diversity and diet quality for urban Vietnamese households? *Aust. J. Agric. Resour. Econ.* **2019**, *63*, 499–520, doi:10.1111/1467-8489.12308.
9. Di Falco, S.; Veronesi, M.; Yesuf, M. Does adaptation to climate change provide food security? A micro-perspective from Ethiopia. *Am. J. Agric. Econ.* **2011**, *93*, 829–846, doi:10.1093/ajae/aar006.
10. Khonje, M.G.; Qaim, M. Modernization of African food retailing and (un)healthy food consumption. *Sustainability* **2019**, *11*, 4306, doi:10.3390/su11164306.
11. Demmler, K.M.; Ecker, O.; Qaim, M. Supermarket shopping and nutritional outcomes: A panel data analysis for urban Kenya. *World Dev.* **2018**, *102*, 292–303, doi:10.1016/j.worlddev.2017.07.018.
12. Schap, T.; Kuczynski, K.; Hiza, H. Healthy eating index—Beyond the score. *J. Acad. Nutr. Diet.* **2017**, *117*, 519–521, doi:10.1016/j.jand.2017.02.002.
13. Smith, T.A. Do school food programs improve child dietary quality? *Am. J. Agric. Econ.* **2016**, *99*, 339–356, doi:10.1093/ajae/aaw091.
14. Whiteman, E.D.; Chrisinger, B.W.; Hillier, A. Diet quality over the monthly supplemental nutrition assistance program cycle. *Am. J. Prev. Med.* **2018**, *55*, 205–212, doi:10.1016/j.amepre.2018.04.027.
15. FAO. *Human Energy Requirements. Report of a Joint FAO/WHO/UNU Expert Consultation, Food and Nutrition Technical Report No. 1*; Food and Agriculture Organization: Rome, Italy, 2001.
16. WHO, FAO. *Vitamin and Mineral Requirements in Human Nutrition*, 2nd ed.; World Health Organization: Geneva, Switzerland, 2004.
17. Institute of Medicine (IOM). *Dietary Reference Intakes: The Essential Guide to Nutrient Requirements*; The National Academies Press: Washington, DC, USA, 2006.
18. Institute of Medicine (IOM). *Dietary Reference Intakes for Energy, Carbohydrate, Fiber, Fat, Fatty Acids, Cholesterol, Protein, and Amino Acids*; The National Academies Press: Washington, DC, USA, 2002.
19. Brown, K.H.; A Rivera, J.; Bhutta, Z.; Gibson, R.S.; King, J.C.; Lönnerdal, B.; Ruel, M.T.; Sandtröm, B.; Wasantwisut, E.; Hotz, C. International Zinc Nutrition Consultative Group (IZiNCG) technical document #1. Assessment of the risk of zinc deficiency in populations and options for its control. *Food Nutr. Bull.* **2004**, *25*, S99–S203.
